# Supplementary material
Source: publisher site journal article supplement (https://www.spandidos-publications.com/3631/downloadSupplementary)
Supplement: Supplementary file 1 [file downloadSupplementary]

Figure S1. Silencing of ATF4 by si-ATF4 transfection in mice. ATF4 mRNA expression levels were significantly decreased following si-ATF4 transfection compared with untransfected or transfection with si-Con. ATF4, activating transcription factor 4; si, small interfering; Con, control.

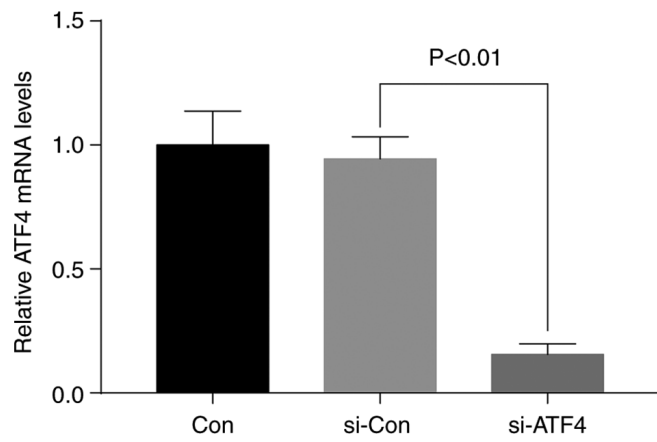

Table SI. Neurological behavior scores.

| Test                        | Behavior                                                                                                                     | Score |
|-----------------------------|------------------------------------------------------------------------------------------------------------------------------|-------|
| Spontaneous activity        | Moved around; explored the environment; approached $\geq 3$ walls of the cage                                                | 3     |
|                             | Slightly affected movement; did not approach walls of the cage; hesitant movement; moved to least one upper edge of the cage | 2     |
|                             | Severely affected movement; did not rise up at all; barely moved around the cage                                             | 1     |
|                             | No movement                                                                                                                  | 0     |
| Symmetrical limb movement   | All four limbs extended symmetrically                                                                                        | 3     |
|                             | Left limbs extended less or more slowly than right limbs                                                                     | 2     |
|                             | Left limbs showed minimal movement                                                                                           | 1     |
| Forepaw outstretching       | No left forelimb movement                                                                                                    | 0     |
|                             | Both forepaws outstretched; symmetrical forepaw walking                                                                      | 3     |
|                             | Left side outstretched less than the right; impaired forepaw walking                                                         | 2     |
|                             | Minimal left forepaw movement                                                                                                | 1     |
| Climbing                    | No left forepaw movement                                                                                                     | 0     |
|                             | Climbed easily; gripped wire tightly                                                                                         | 3     |
|                             | Climbing impaired on the left side or looser grip on wire compared with right side                                           | 2     |
| Proprioception              | Failed to climb or tended to circle                                                                                          | 1     |
|                             | Turned head; equally startled by stimulus on both sides                                                                      | 3     |
|                             | Reacted slowly to stimulus on the left side                                                                                  | 2     |
| Response to vibrissae touch | Did not react to stimulus on the left side                                                                                   | 1     |
|                             | Turned head; equally startled by stimulus on both sides                                                                      | 3     |
|                             | Reacted slowly to stimulus on the left side                                                                                  | 2     |
|                             | Did not react to stimulus on the left side                                                                                   | 1     |
